# Supplementary material for: Horizontally and vertically aligned growth of strained MoS2 layers with dissimilar wetting and catalytic behaviors
Source: Royal Society of Chemistry journal article supplement (doi:10.1039/c7ce01162h), 2017-01-01
Supplement: c7ce01162h1.pdf [file c7ce01162h1.pdf]

## Supplementary Information

### Horizontally and Vertically Aligned Growth of Strained MoS<sub>2</sub> Layers with Dissimilar Wetting and Catalytic Behavior

Pawan Kumar and B. Viswanath\*

School of Engineering, Indian Institute of Technology Mandi, Kamand, Himachal Pradesh-175005.

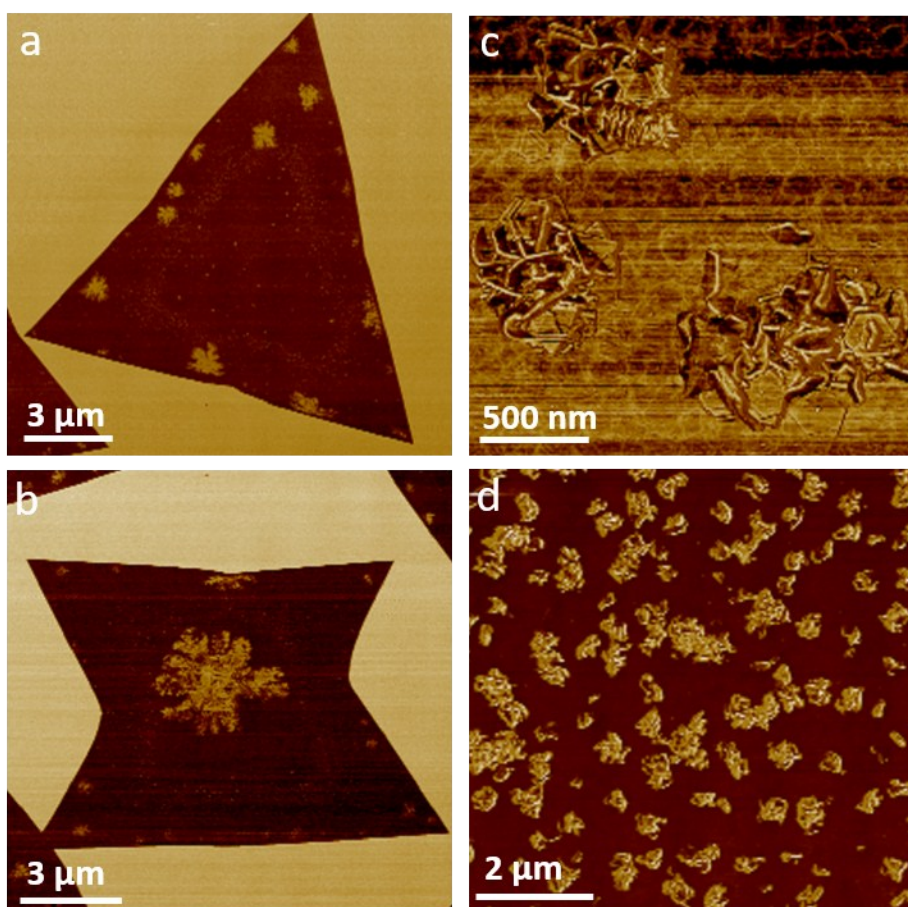

Figure S1: AFM phase imaging of horizontally aligned (a, b) and (c, d) vertically aligned MoS<sub>2</sub> nanostructure. Formation of new seed layer on top of horizontally grown MoS<sub>2</sub> flake is evident from (b). As grown vertical standing MoS<sub>2</sub> on top of horizontally aligned MoS<sub>2</sub> nanostructures are shown in (c).

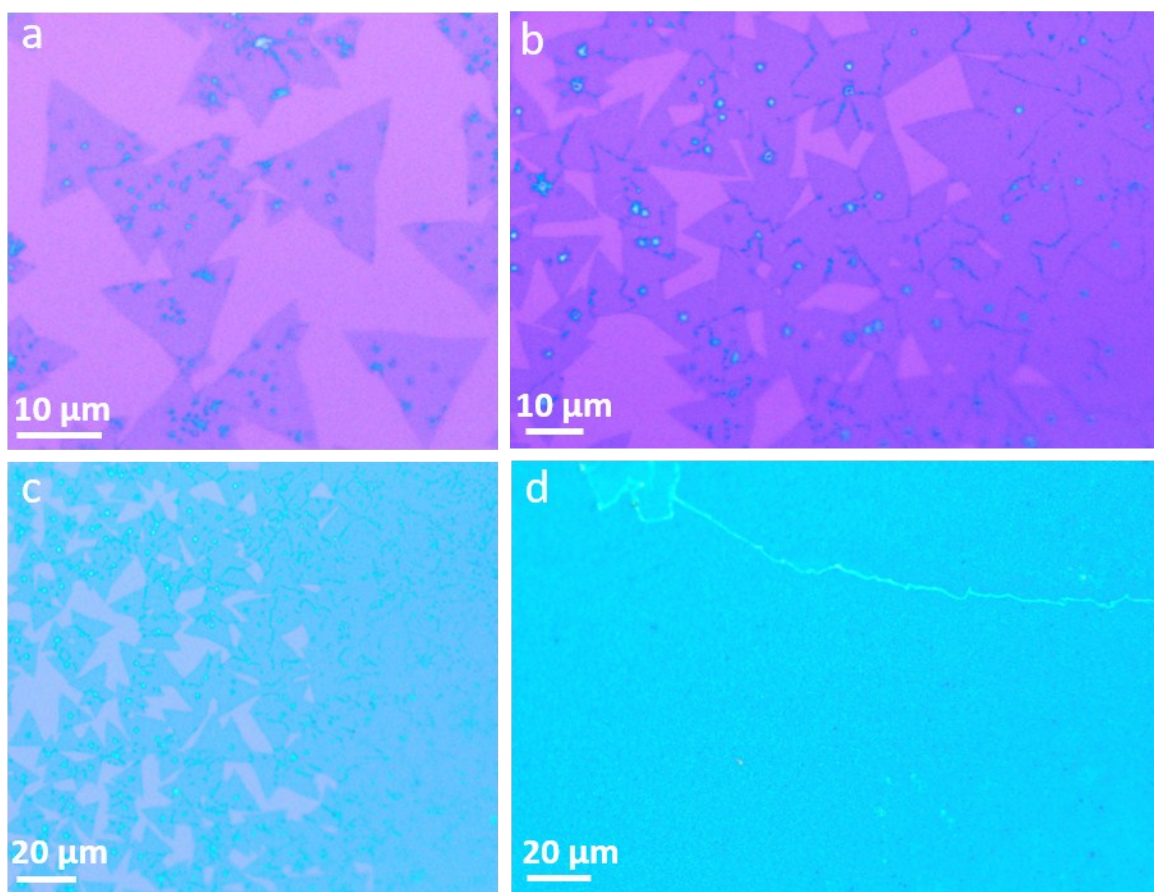

Figure S2: Visible light microscope (VLM) imaging carried out at different location showing individual as well as interconnected MoS<sub>2</sub> flakes with different coverage. (a, b) Monolayer MoS<sub>2</sub> flakes with lateral dimension of  $\sim 15 \mu\text{m}$  undergoing coalescence and forms interconnected structure. Formation of continuous film consisting of interconnected MoS<sub>2</sub> flakes with full coverage of  $1 \times 1 \text{ cm}^2$  on SiO<sub>2</sub>/Si substrate are shown in (c, d).

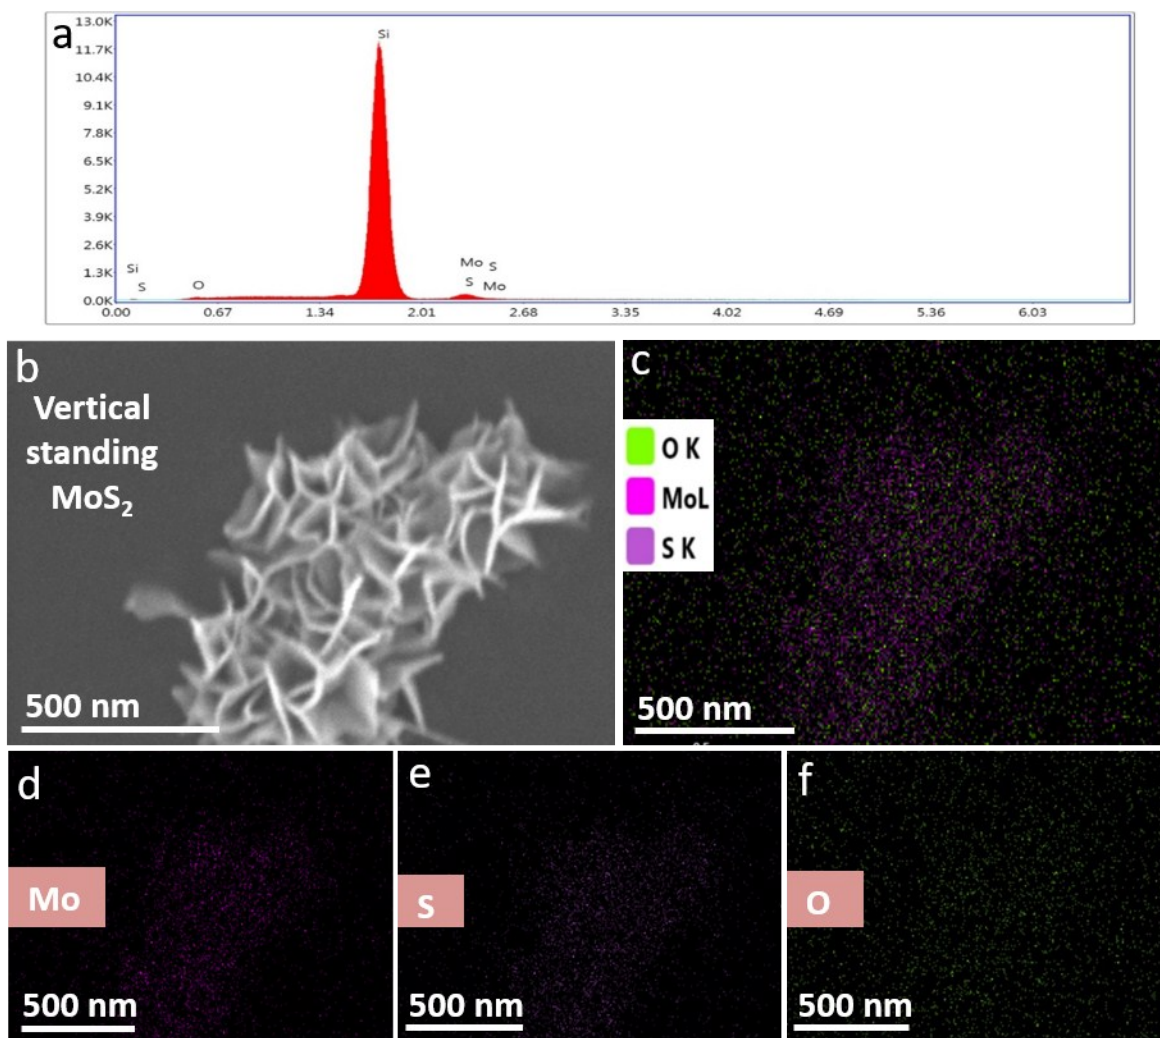

Figure S3: Elemental mapping of vertically aligned  $\text{MoS}_2$  using EDS-FESEM system; Spectrum shown in (a) has clear elemental analysis for presence of  $\text{MoS}_2$  on Si substrate. FESEM micrograph of vertically grown  $\text{MoS}_2$  nanostructure and the corresponding elemental mapping are shown in (b) and (c). Images depicting individual elements (Mo, S & O) are shown in (d) Molybdenum (e) Sulfur and (f) Oxygen.

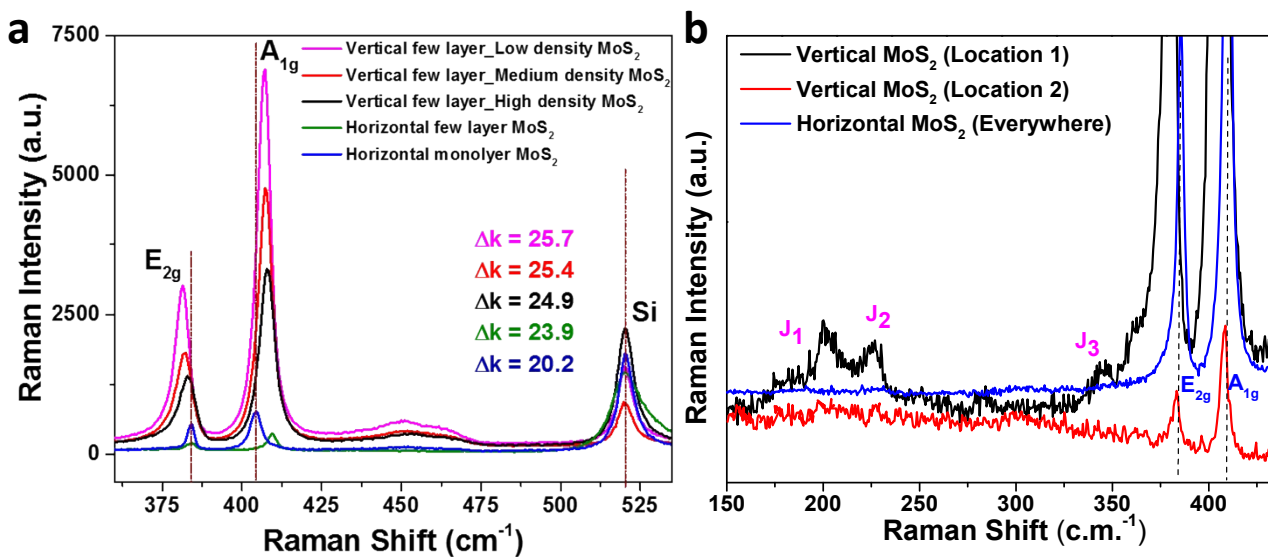

Figure S4: (a) Raman modes observed for different anisotropic aligned MoS<sub>2</sub> nanostructures with varying density. Raman shift and intensity variation influenced by the observed density variation in vertically aligned MoS<sub>2</sub>. (b) Presence of 2H and 1T phase in vertically aligned MoS<sub>2</sub> measured at different locations whereas only 2H phase significantly present in horizontally aligned MoS<sub>2</sub>.



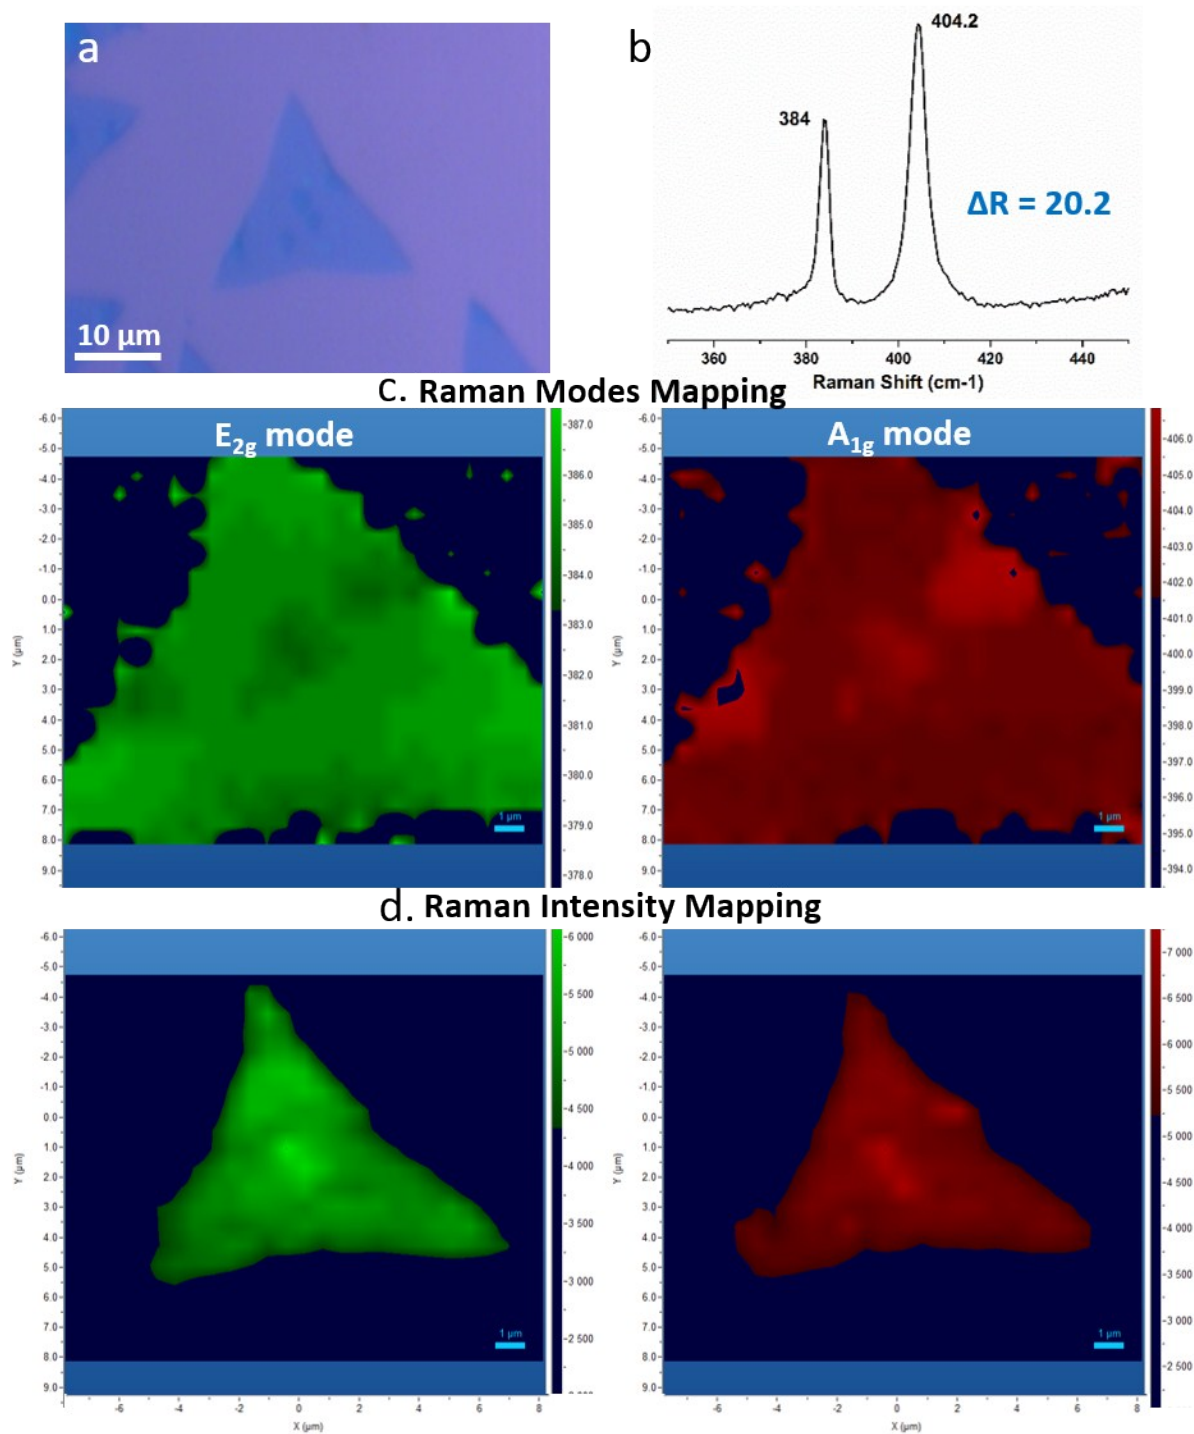

Figure

re S5: (a) Visible light microscope imaging along with Raman spectrum confirms the growth of monolayer MoS<sub>2</sub> on Si substrate. (b) Difference in Raman shift ( $\Delta R \sim 20.2 \text{ cm}^{-1}$ ) observed between E<sub>2g</sub> and A<sub>1g</sub> Raman vibration modes is consistent with earlier reports. Slight contrast variation observed in the Raman mode and intensity mapping indicates the nucleation of seed layers on top of MoS<sub>2</sub> monolayer(c, d).

### a. Raman Modes Mapping

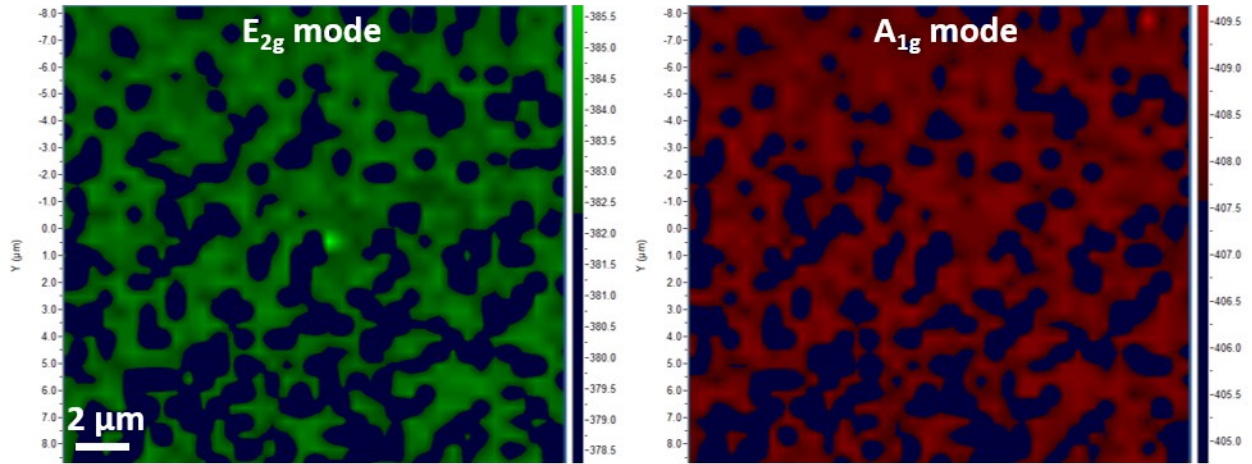

### b. Raman Intensity Mapping

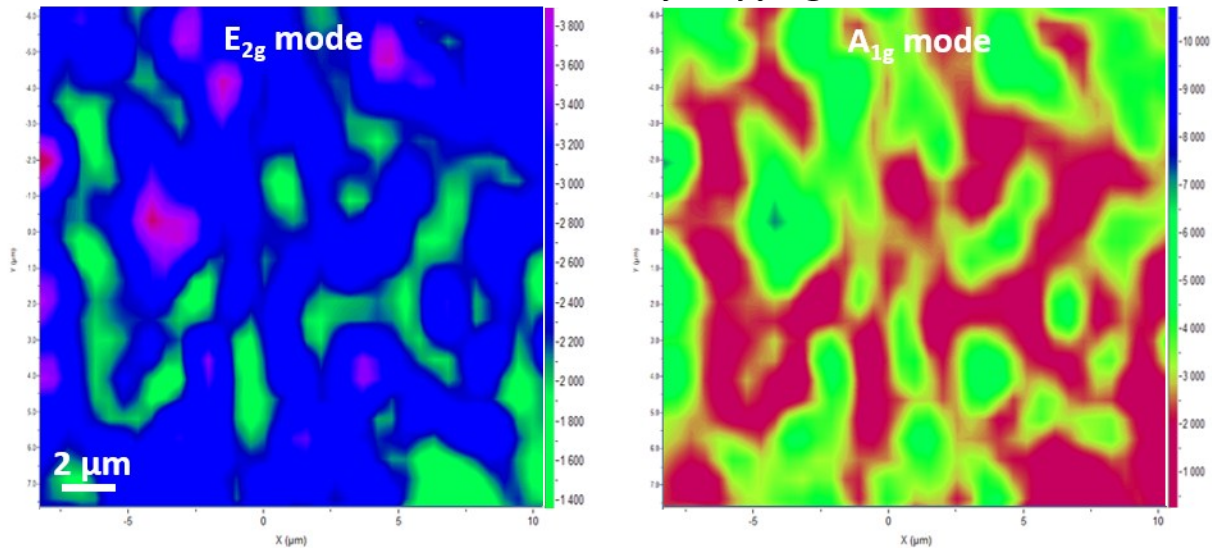

Figure S6: (a) Raman mapping of  $E_{2g}$  and  $A_{1g}$  vibration modes for few layer vertical standing  $MoS_2$  and their corresponding (b) Raman intensity maps. Intensity mapping of  $A_{1g}$  mode shows two fold increase compared to  $E_{2g}$  mode intensity for the same position in vertically aligned  $MoS_2$ .

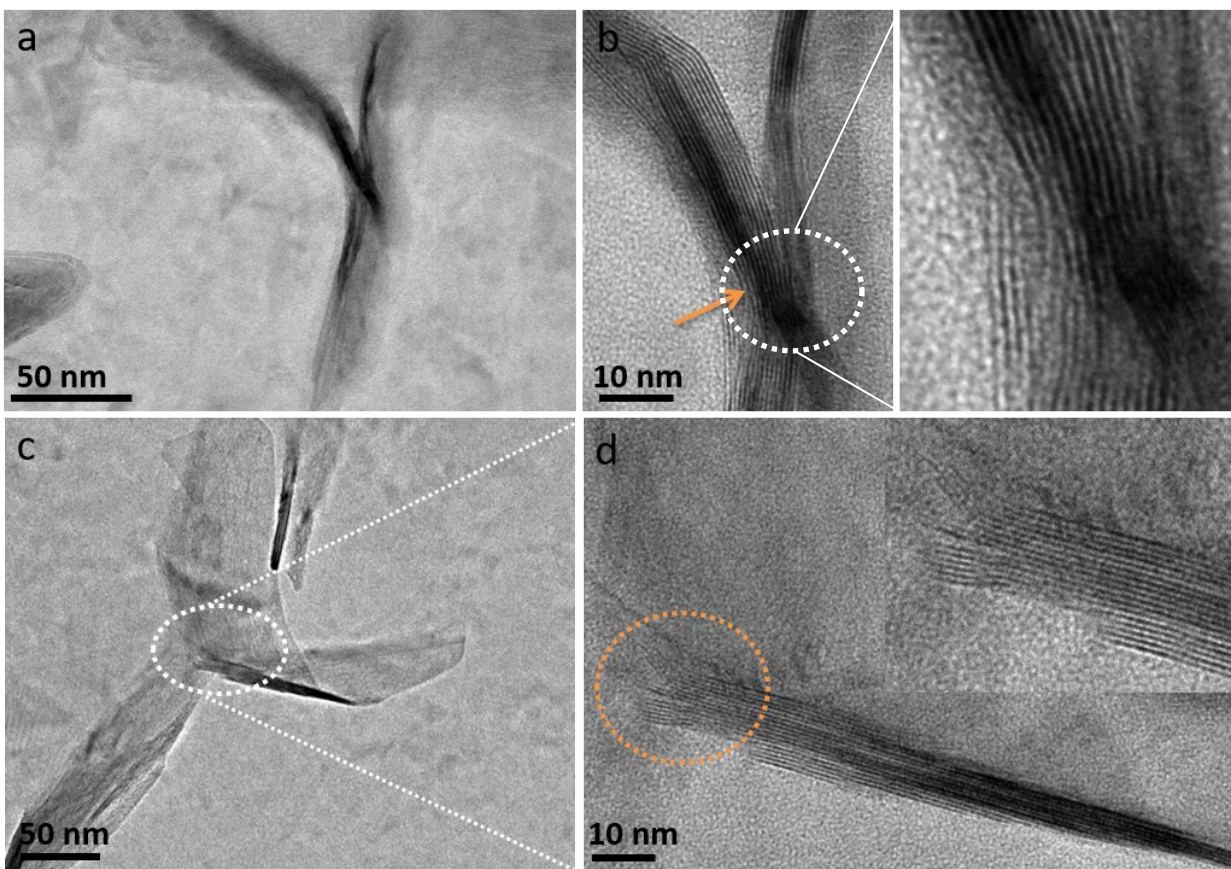

Figure S7: TEM bright field and lattice images of vertically standing  $\text{MoS}_2$  layers undergoing coalescence are shown in (a - c) respectively. Number of atomic thin layers present in each  $\text{MoS}_2$  flake and coalescence induced deformation is evident in (b) along with high resolution image of marked circular portion. Similarly, bending in atomic thin  $\text{MoS}_2$  flakes causes strain between intra layers lead to mechanical deformation (crack) as indicated by circular marked region in figure (d) with inset showing high resolution TEM micrographs.

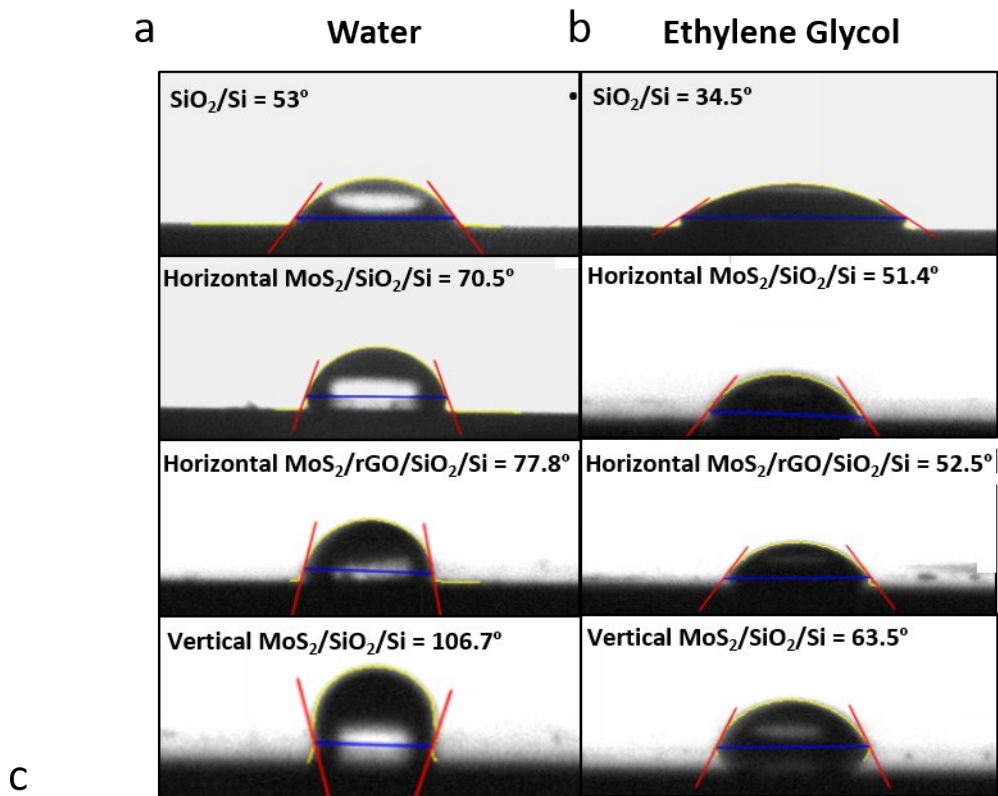

| S. No. | Sample description                              | Contact Angle |                 | Total Surface Energy (mJ/m <sup>2</sup> ) | Surface Energy (mJ/m <sup>2</sup> ) (Polar) | Surface Energy (mJ/m <sup>2</sup> ) (Dispersive) |
|--------|-------------------------------------------------|---------------|-----------------|-------------------------------------------|---------------------------------------------|--------------------------------------------------|
|        |                                                 | Water         | Ethylene Glycol |                                           |                                             |                                                  |
| 1.     | SiO <sub>2</sub> /Si (Bare Substrate)           | 53°           | 34.5°           | 51.19                                     | 47.04                                       | 4.15                                             |
| 2.     | Flat MoS <sub>2</sub> /SiO <sub>2</sub> /Si     | 70.5°         | 51.4°           | 33.39                                     | 27.99                                       | 5.40                                             |
| 3.     | Vertical MoS <sub>2</sub> /SiO <sub>2</sub> /Si | 106.7°        | 63.5°           | 22.39                                     | 0.26                                        | 22.14                                            |

Figure S8: Contact angle measurement for horizontally and vertically aligned MoS<sub>2</sub> nanostructure with respect to two different liquid (a) Water and (b) Ethylene glycol having known surface tension. (c) Corresponding calculated surface energies for both oriented MoS<sub>2</sub> nanostructures.



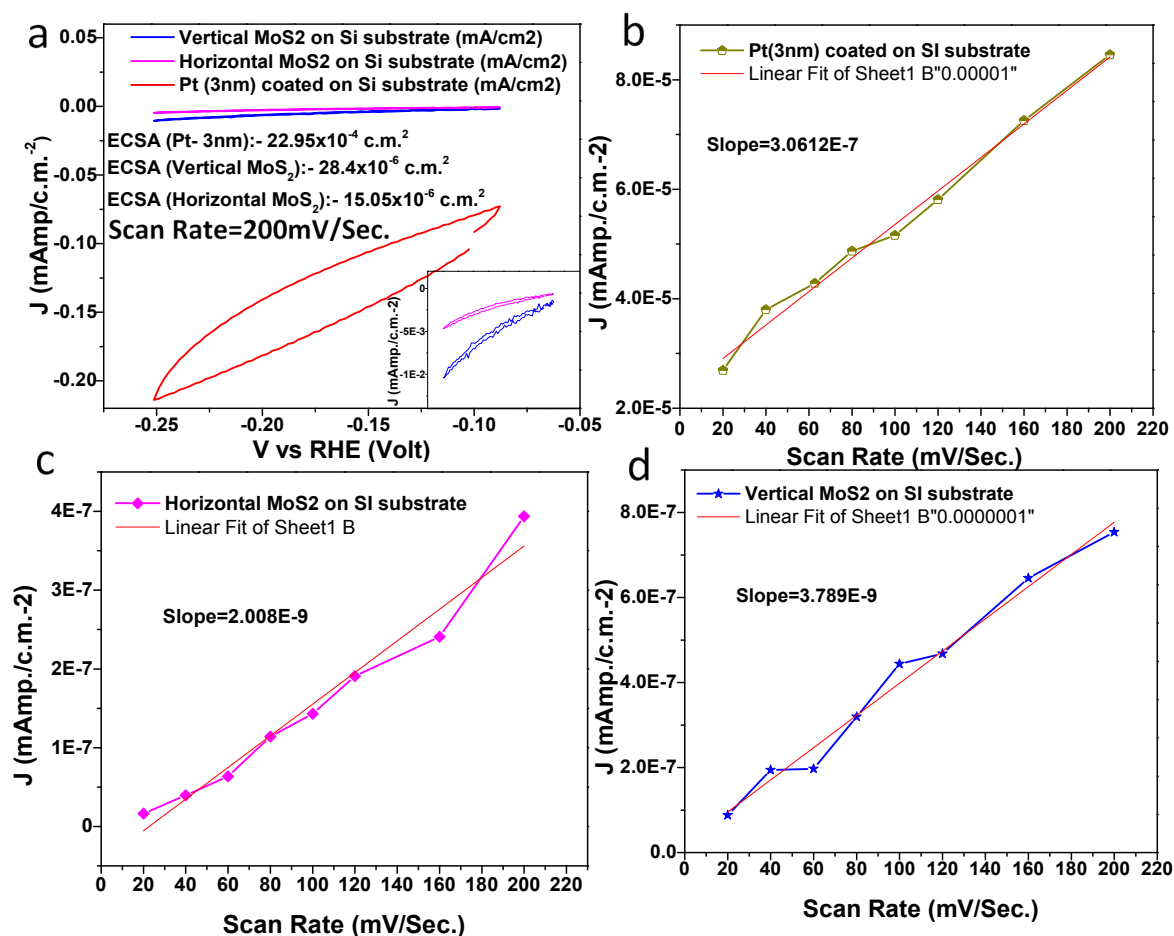

Figure S9: Comparative CV measurement plot at scan rate of 200 mV/sec. and fitted curves for the different scan rate based CV measurement across both nanostructures of MoS<sub>2</sub> as well as Pt. (3nm) coated on Si substrate to calculate  $C_{dl}$  and further analyze the ECSA.

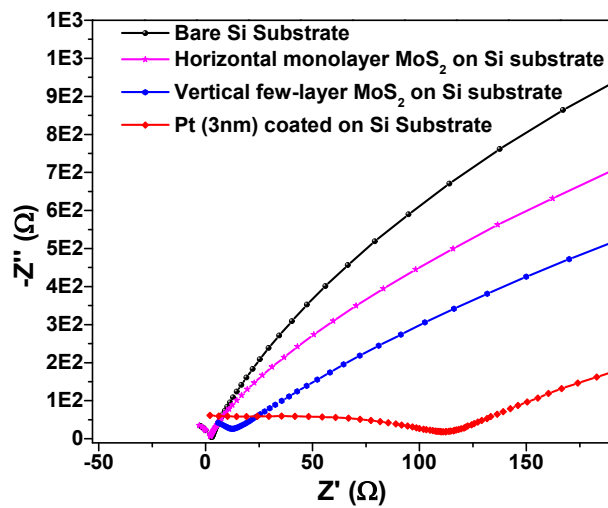

Figure S10: Zoomed region of impedance analysis for different aligned MoS<sub>2</sub> nanostructures with standard Pt. (3 nm).

Table ST1: Controlled growth conditions to achieve horizontal and vertical MoS<sub>2</sub> nanostructures.

| Substrate                                                        | Growth Parameters                                   | Horizontal MoS <sub>2</sub> | Vertical MoS <sub>2</sub> |
|------------------------------------------------------------------|-----------------------------------------------------|-----------------------------|---------------------------|
| Si<br>SiO <sub>2</sub> /Si<br>Si <sub>3</sub> N <sub>4</sub> /Si | Temperature Zone 1 (MoO <sub>3</sub> ) : Zone 2 (S) | 650°C : (180°C - 220°C)     | 700°C : (400°C - 450°C)   |
|                                                                  | Ar flow                                             | ~ 5 sccm                    | ~ 5 sccm                  |
|                                                                  | S - MoO <sub>3</sub> ratio                          | ~18                         | ~22                       |
|                                                                  | S - MoO <sub>3</sub> distance                       | ~15 cm                      | ~12 cm                    |
|                                                                  | Growth Time                                         | ~ 3 to 5 min.               | ~ 10 min.                 |
